# Supplementary material
Source: publisher site journal article supplement (https://content.cld.iop.org/journals/1748-9326/15/11/113005/revision2/erl_53_11_113005supp1.pdf)
Supplement: Supplementary file 1 [file erl_53_11_113005supp1.pdf]

# Cooling demand in Integrated Assessment Models: a Methodological Review

Francesco Pietro Colelli<sup>1,2,3</sup>

Enrica De Cian<sup>1,2,3</sup>

1 Ca'Foscari University of Venice, Department of Economics

2 Centro Euro-Mediterraneo sui Cambiamenti Climatici, Venice.

3 RFF-CMCC European Institute on Economics and the Environment (EIEE)

Supplementary Material

| Table 1                                                                                                                                                                                                                                                                   |                     |
|---------------------------------------------------------------------------------------------------------------------------------------------------------------------------------------------------------------------------------------------------------------------------|---------------------|
| Query                                                                                                                                                                                                                                                                     | Number of documents |
| ( "energy demand" OR "energy use" OR "energy consumption" )<br>AND ( "climate change" )<br>AND ( "conditioning" OR "cooling" )<br>AND ( "heating" )                                                                                                                       | 5,502               |
| ( "energy demand" OR "energy use" OR "energy consumption" )<br>AND ( "climate change" )<br>AND ( "conditioning" OR "cooling" )<br>AND ( "heating" )<br>AND ( "scenario" OR "projection" OR "impacts" )                                                                    | 4,637               |
| ( "energy demand" OR "energy use" OR "energy consumption" )<br>AND ( "climate change" )<br>AND ( "conditioning" OR "cooling" )<br>AND ( "heating" )<br>AND ( "scenario" OR "projection" OR "impacts" )<br>AND ( "GDP" OR "wealth" OR "economic loss" OR "economic gain" ) | 237                 |
| ( "energy demand" OR "energy use" OR "energy consumption" )<br>AND ( "climate change" )<br>AND ( "conditioning" OR "cooling" )<br>AND ( "heating" )<br>AND ( "scenario" OR "projection" OR "impacts" )<br>AND ( "integrated assessment model" OR "energy model" )         | 516                 |

**Table 1. Search query and associated document results from the Scopus Database**
